# Supplementary material
Source: PubMed Central journal article supplement (PMC4656098)
Supplement: NIHMS706093-supplement-supplement_1.pdf [file NIHMS706093-supplement-supplement_1.pdf]

# Supplemental Content

**Ciszek BP, Khan AA, Dang H et al. MicroRNA expression profiles differentiate chronic pain condition subtypes**

## **Supplemental Materials**

Supplemental Figure 1. Pelvic muscle pressure pain is enhanced in patients with VBD and VBD + IBS.

Supplemental Figure 2. Pelvic mucosa pressure pain is enhanced in patients with VBD and VBD+IBS.

Supplemental Figure 3. MicroRNA Signatures Are Altered in VBD and VBD+IBS.

Supplemental Table 1. MicroRNA expression is correlated with intermediate phenotype data.

Supplemental Table 2. MicroRNA Pathway Dysregulation in VBD+IBS.

Supplemental Table 3. MicroRNA Pathway Dysregulation in VBD+IBS.

Figure 4 Abbreviations

This supplementary material has been provided by the authors to give the readers additional information about their work.

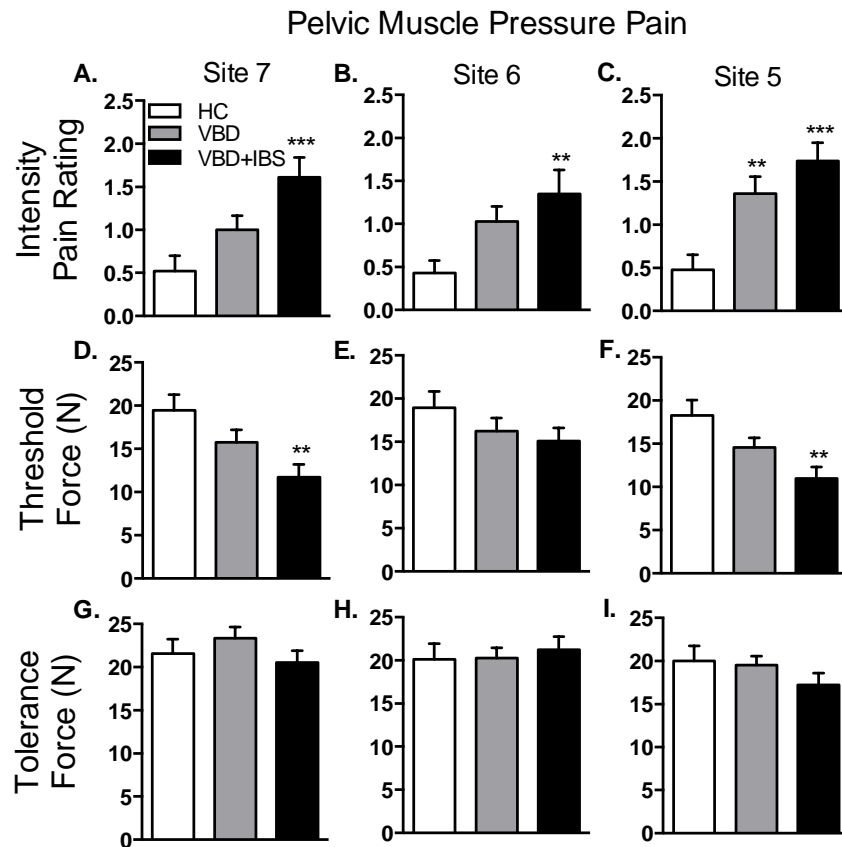

**Supplemental Figure 1. Pelvic muscle pressure pain is enhanced in patients with VBD and VBD + IBS.**

Patients with VBD alone exhibit modest increases in pain intensity (**A-C**) and decreases in mechanical threshold (**D-F**) at all 3 pelvic muscle sites, while those with VBD+IBS report dramatic increases in intensity and decreases in thresholds. No differences in tolerance were reported across groups (**G-I**). Data are Mean  $\pm$  SEM. \* $p < .05$ , \*\* $p < .01$ , \*\*\* $p < .001$  compared to HC.

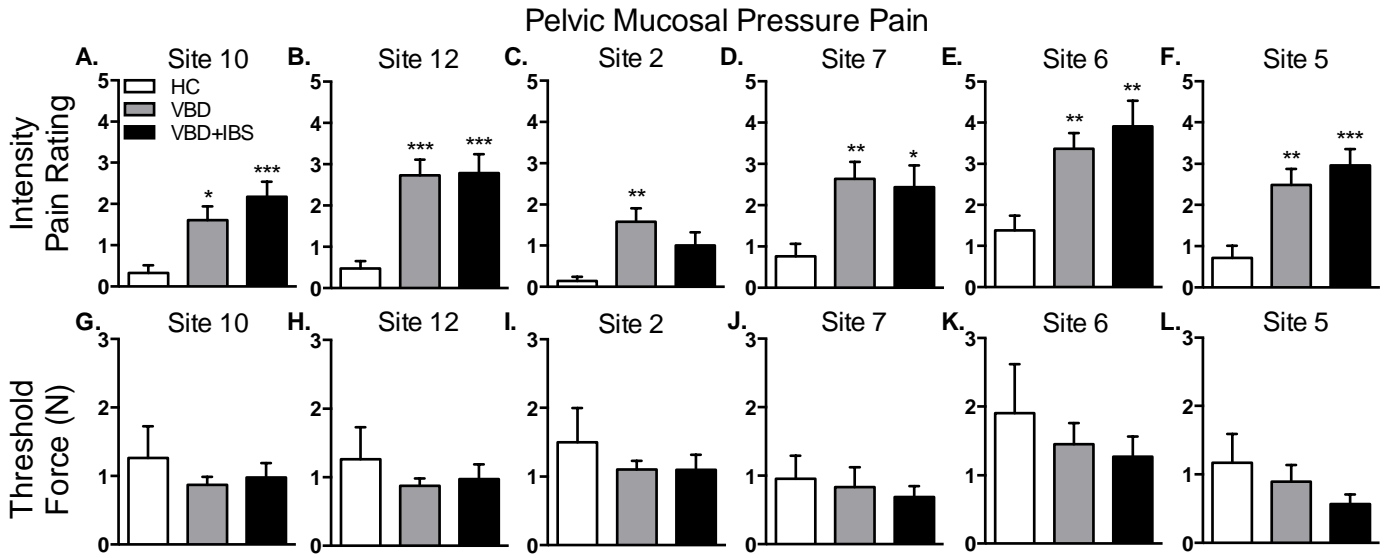

**Supplemental Figure 2. Pelvic mucosa pressure pain is enhanced in patients with VBD and VBD+IBS.**

VBD and VBD+IBS patients reported trends of enhanced pain intensity (**A-F**) and decreased pain thresholds (**G-L**) at all 6 pelvic mucosal sites. Data are Mean  $\pm$  SEM.

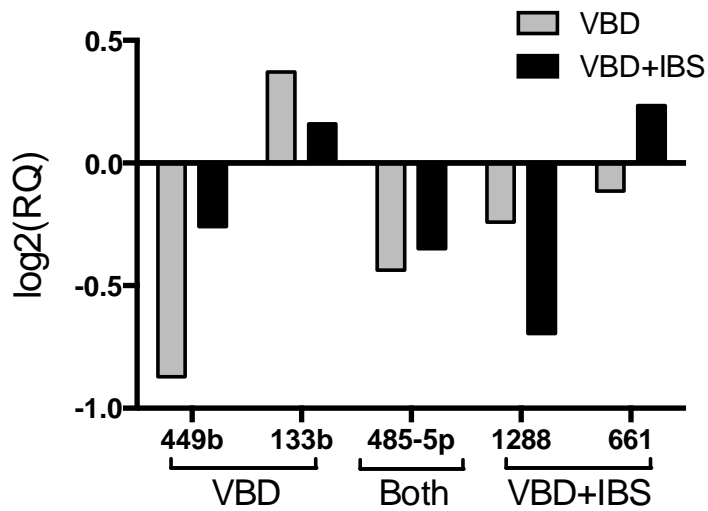

**Supplemental Figure 3. MicroRNA Signatures Are Altered in VBD and VBD+IBS.** Consistent with our miRNA array results, women with VBD (N=5) have decreased miR-449b and increased miR-133b whereas women with VBD+IBS (N=5) have decreased miR-1288 and increased miR-661 as compared to HC (N=5). Women in both groups have decreased miR-485-5p as compared to HC.

**Supplemental Table 1. MicroRNA expression is correlated with intermediate phenotype data**

| <b>Intermediate Phenotype</b>           | <b>miRNA</b> | <b>Correlation (r)</b> | <b>p-value</b> |
|-----------------------------------------|--------------|------------------------|----------------|
| IL-1ra expression                       | miR-99b      | -0.74                  | <0.0001        |
|                                         | miR-373      | 0.44                   | 0.020          |
|                                         | miR-627      | 0.42                   | 0.034          |
| IL-8 expression                         | miR-125a-5p  | -0.44                  | 0.052          |
| Stabbing Pain (MPQ)                     | miR-1305     | 0.56                   | <0.001         |
|                                         | miR-425#     | -0.54                  | <0.001         |
|                                         | miR-30d      | -0.54                  | <0.001         |
|                                         | miR-1255B    | -0.52                  | <0.001         |
|                                         | miR-454#     | -0.51                  | <0.001         |
|                                         | miR-302b     | 0.51                   | <0.001         |
|                                         | miR-15b#     | -0.51                  | <0.001         |
|                                         | miR-320B     | -0.49                  | <0.01          |
|                                         | miR-551b     | 0.43                   | 0.015          |
|                                         | miR-570      | 0.42                   | 0.023          |
|                                         | miR-1254     | -0.41                  | 0.027          |
|                                         | miR-487a     | 0.40                   | 0.037          |
| Affective Pain (MPQ)                    | miR-551b     | 0.49                   | 0.015          |
| Impact of Pain on Daily Activity (CPSQ) | miR-491-3p   | 0.48                   | 0.029          |
|                                         | miR-10b      | 0.46                   | 0.035          |
| Remote Bodily Pressure Pain (Masseter)  | RNU44        | -0.55                  | <0.001         |
|                                         | miR-645      | -0.47                  | 0.010          |
|                                         | miR-1274A    | -0.45                  | 0.016          |
|                                         | miR-213      | -0.42                  | 0.036          |
|                                         | miR-543      | -0.41                  | 0.037          |
|                                         | RNU48        | -0.41                  | 0.037          |
|                                         | miR-192#     | -0.40                  | 0.041          |
|                                         | miR-1274B    | -0.40                  | 0.041          |
| Remote Bodily Pressure                  | RNU44        | -0.56                  | <0.001         |

|                  |           |       |       |
|------------------|-----------|-------|-------|
| Pain (Trapezius) | RNU48     | -0.44 | 0.019 |
|                  | miR-543   | -0.44 | 0.019 |
|                  | miR-645   | -0.44 | 0.019 |
|                  | miR-1274A | -0.43 | 0.019 |
|                  | miR-1270  | -0.43 | 0.019 |
|                  | miR-1179  | -0.43 | 0.019 |
|                  | miR-589   | -0.42 | 0.020 |
|                  | miR-378   | -0.42 | 0.022 |
|                  | miR-213   | -0.41 | 0.024 |
|                  | miR-1180  | -0.40 | 0.027 |

**Abbreviations:** Interleukin 1 receptor antagonist (IL-1ra), interleukin 8 (IL-8), McGill Pain Questionnaire (MPQ), Comprehensive Pain and Symptom Questionnaire (CPSQ).

---

Supplemental Table 2. MicroRNA Pathway Dysregulation in VBD+IBS

| MiRNAs                                                            | Target Genes                                                                                                                                                                                                                                                                                                                                                      | ln(p-val) |
|-------------------------------------------------------------------|-------------------------------------------------------------------------------------------------------------------------------------------------------------------------------------------------------------------------------------------------------------------------------------------------------------------------------------------------------------------|-----------|
| <b>Wnt Signaling</b>                                              |                                                                                                                                                                                                                                                                                                                                                                   |           |
| miR-34b<br>miR-449b<br>miR-503<br>miR-645<br>miR-200b<br>miR-133b | CCND2, CTNNB1, DKK1, FZD4, FZD5, MAP3K7, VANGL2, DAAM1, LEF1, MYC, NFAT5, PLCB1, SMAD2, SMAD4, TP53, WNT1, BTRC, CCND2, CCND2, CCND3, FOSL1, MAP3K7, NKD1, PPP3CB, WNT3A, PPP3CB, CTBP2, EP300, FBXW11, JUN, MPAK9, PLCB4, PPP2R2C, PRKACB, PRKCA, RAC1, RHOA, SIAH1, WNT16, CTBP2, CXXC4, FBXW11, NFAT5, NFATC2, PLCB4, PPP2CA, PPP2CB, PSEN1, TBL1X, TCF7, WNT4 | 21.37     |
| <b>Adherens Junction</b>                                          |                                                                                                                                                                                                                                                                                                                                                                   |           |
| miR-34b<br>miR-449b<br>miR-503<br>miR-200b<br>miR-133b            | CTNNB1, MAP3K7, LEF1, MET, PTPRM, PVRL1, SMAD2, SMAD4, VCL, WASF1, IGF1R, MAP3K7, PVRL1, WASL, EP300, LMO7, PVRL1, PVRL4, RAC1, RHOA, WASF1, WASF3, EGFR, FGFR1, IGF1R, INSR, MLLT4, TCF7, TGFB1, WASF2, YES1                                                                                                                                                     | 18.76     |
| <b>Colorectal Cancer</b>                                          |                                                                                                                                                                                                                                                                                                                                                                   |           |
| miR-34b<br>miR-449b<br>miR-503<br>miR-200b<br>miR-133b            | CTNNB1, FZD4, FZD5, GRB2, PIK3R3, LEF1, MAP2K1, MET, MYC, PDGFRA, SMAD2, SMAD4, TP53, AKT3, BCL2, CCND1, CDD, IGF1R, MAP2K1, PIK3R1, RAF1, ACVR1C, APPL1, BCL2, JUN, KRAS, MAPK9, RAC1, SOS1, EGFR, IGF1R, TCF7, TGFB1                                                                                                                                            | 18.33     |
| <b>Prostate Cancer</b>                                            |                                                                                                                                                                                                                                                                                                                                                                   |           |
| miR-34b<br>miR-449b<br>miR-503<br>miR-200b<br>miR-133b            | CREB1, CREB3, CREB3L1, CTNNB1, GRB2, PDGFA, PIK3R3, CREB1, CREB3L1, E2F3, LEF1, MAP2K1, PDGFRA, TP53, AKT3, BCL2, CCND1, CCNE1, CREB5, E2F3, IGF1R, IKBKB, MAP2K1, PIK3R1, RAF1, BCL2, CCNE2, CDK2, CDKN1B, CREB5, E2F3, EP300, IKBKB, KRAS, SOS1, CREB5, EGFR, FGFR1, IGF1R, TCF7                                                                                | 17.01     |
| <b>Chronic Myeloid Leukemia</b>                                   |                                                                                                                                                                                                                                                                                                                                                                   |           |
| miR-34b<br>miR-449b<br>miR-503<br>miR-200b<br>miR-133b            | GRB2, PIK3R3, E2F3, HDAC1, MAP2K1, MYC, SMAD4, TP53, AKT3, CCND1, E2F3, IKBKB, MAP2K1, PIK3R1, RAF1, ACVR1C, CBL, CDKN1B, CRKL, CTBP2, E2F3, IKBKB, KRAS, PTPN11, SHC1, SOS1, BCL2L1, CRK, CTBP2, EVI1, TGFB1                                                                                                                                                     | 14.95     |
| <b>Renal Cell Carcinoma</b>                                       |                                                                                                                                                                                                                                                                                                                                                                   |           |
| miR-34b<br>miR-449b<br>miR-503<br>miR-                            | GRB2, PIK3R3, RAP1B, ARNT2, ETS1, MAP2K1, MET, AKT3, MAP2K1, PIK3R1, RAF1, VEGFA, CRKL, EGLN1, EP300, ETS1, GAB1, JUN, KRAS, PAK6, PAK7, PTPN11, RAC1, RAP1B, SOS1, TCEB1, VEGFA, CRK                                                                                                                                                                             | 14.35     |

|                                                                   |                                                                                                                                                                                                                                                                                                                                                                                                                                                                            |       |
|-------------------------------------------------------------------|----------------------------------------------------------------------------------------------------------------------------------------------------------------------------------------------------------------------------------------------------------------------------------------------------------------------------------------------------------------------------------------------------------------------------------------------------------------------------|-------|
| 200b<br>miR-133b                                                  |                                                                                                                                                                                                                                                                                                                                                                                                                                                                            |       |
| <b>ErbB Signaling Pathway</b>                                     |                                                                                                                                                                                                                                                                                                                                                                                                                                                                            |       |
| miR-34b<br>miR-449b<br>miR-503<br>miR-645<br>miR-200b<br>miR-133b | ERBB4, GRB2, NCK2, PIK3R3, RPS6KB1, MAP2K1, MYC, RPS6KB1, AKT3, MAP2K1, PIK3R1, RAF1, HBEGF, CBL, CDKN1B, CRKL, GAB1, JUN, KRAS, MAPK9, PAK6, PAK7, PLCG1, PRKCA, RPS6KB1, SHC1, SOS1, CRK, EGFR, MAP2K4                                                                                                                                                                                                                                                                   | 12.44 |
| <b>Melanogenesis</b>                                              |                                                                                                                                                                                                                                                                                                                                                                                                                                                                            |       |
| miR-34b<br>miR-449b<br>miR-503<br>miR-200b<br>miR-133b            | CREB1, CREB3, CREB3L1, CTNNB1, FZD4, FZD5, CREB1, CREB3L1, KITLG, MAP2K1, MITF, PLCB1, WNT1, GNAI3, MAP2K1, RAF1, WNT3A, ADCY2, ADCY9, EP300, GNAI3, KRAS, PLCB4, PRKACB, PRKCA, WNT16, ADCY5, ADCY6, CALM1, PLCB4, TCF7, WNT4                                                                                                                                                                                                                                             | 10.51 |
| <b>Focal Adhesion</b>                                             |                                                                                                                                                                                                                                                                                                                                                                                                                                                                            |       |
| miR-34b<br>miR-449b<br>miR-503<br>miR-200b<br>miR-133b            | CCND2, CTNNB1, GRB2, ITGA2, PDGFA, PIK3R3, RAP1B, RELN, VAV3, MAP2K1, MET, PDGFRA, THBS1, VCL, AKT3, BCL2, CCND1, CCND2, CCND3, IGF1R, MAP2K1, MYLK, PIK3R1, RAF1, VEGFA, BCL2, CRKL, FLT1, FM1, JUN, KDR, LAMC1, MAPK9, MYLK, PAK6, PAK7, PRKCA, RAC1, RAP1B, RELN, RHOA, SHC1, SOS1, TLN2, VEGFA, XIAP, COL1A1, COL5A3, COL6A3, CRK, EGFR, IGF1R, TNF                                                                                                                    | 10.21 |
| <b>MAPK Signaling Pathway</b>                                     |                                                                                                                                                                                                                                                                                                                                                                                                                                                                            |       |
| miR-34b<br>miR-449b<br>miR-503<br>miR-645<br>miR-200b<br>miR-133b | CACNB2, GRB2, MAP3K1, MAP3K7, MAP3K7IP2, PDGFA, RAP1B, CACNB1, CACNB3, FGF23, HSPA1B, MAP2K1, MAP4K4, MYC, PDGFRA, RPS6KA4, RRAS, TAOK1, TP53, AKT3, FGF2, FGF7, IKBKB, MAP2K1, MAP3K7, MAPK8IP2, NF1, PPP3CB, PTPRR, RAF1, MEF2C, PPP3CB, ACVR1C, CACNA2D1, CACNB2, CRKL, DUSP1, IKBKB, JUN, KRAS, MAP2K5, MAP3K1, MAP3K5, MAP4K3, MAP4K4, MAPK9, NTF3, PRKACB, PRKCA, RAC1, RAP1B, RPS6KA3, SOS1, SRF, CRK, DUSP1, EGFR, EV1, FGF1, FGFR1, MAP2K4, MAP3K3, NFATC2, TGFB1 | 10    |
| <b>Regulation of Actin Cytoskeleton</b>                           |                                                                                                                                                                                                                                                                                                                                                                                                                                                                            |       |
| miR-34b<br>miR-449b<br>miR-503<br>miR-200b<br>miR-133b            | CFL2, ITGA2, NCKAP1, PDGFA, PIK3R3, PIP5K1B, PIP5K3, VAV3, FGF23, IQGAP2, MAP2K1, MYH9, PDGFRA, RDX, RRAS, VCL, WASF1, FGF2, FGF7, MAP2K1, MYH10, MYLK, PIK3R1, RAF1, WASL, CFL2, CRKL, FGD1, FN1, KRAS, LIMK1, MSN, MYLK, PAK6, PAK7, PIP4K2B, PIP5K3, PPP1R12B, RAC1, RHOA, SOS1, SSH2, WASF1, ARPC1A, ARPC5, CRK, DIAPH2, EGFR, FGF1, FGFR1, IQGAP2, MSN, MYH9, PFN2, PIP4K2B, PIP5K3, WASF2                                                                            | 9.67  |
| <b>Pancreatic Cancer</b>                                          |                                                                                                                                                                                                                                                                                                                                                                                                                                                                            |       |
| miR-34b<br>miR-449b<br>miR-503                                    | PIK3R3, E2F3, MAP2K1, RALA, SMAD2, SMAD4, TP53, AKT3, CCND1, E2F3, IKBKB, MAP2K1, PIK3R1, RAF1, VEGFA, ACVR1C, BRCA2, E2F3, IKBKB, KRAS, MAPK9, RAC1, VEGFA, BCL2L1, EGFR, JAK1, TGFB1                                                                                                                                                                                                                                                                                     | 9.57  |



|                                   |                                                        |      |
|-----------------------------------|--------------------------------------------------------|------|
| miR-200b                          |                                                        |      |
| miR-133b                          |                                                        |      |
| <b>Axon Guidance</b>              |                                                        |      |
| miR-34b                           | CFL2, DPYSL2, EPHA7, NCK2, NTNG1, ABLIM3, EFNB1, MET,  | 8.58 |
| miR-449b                          | NFAT5, SEMA4C, SEMA4F, DCC, EFNB2, EPHA7, GNAI3,       |      |
| miR-503                           | PPP3CB, SEMA3D, SEMA6D, PPP3CB, SEMA3F, SEMA6D,        |      |
| miR-645                           | CFL2, EFNA1, EFNB2, GNA13, KRAS, LIMK1, PAK6, PAK7,    |      |
| miR-200b                          | PLXNA2, RAC1, RHOA, SEMA3F, SEMA6D, EFNA4, EPHA7,      |      |
| miR-133b                          | EPHB4, NFAT5, HFATC2, SRGAP2, SRGAP3                   |      |
| <b>Notch Signaling Pathway</b>    |                                                        |      |
| miR-449b                          | APH1A, DLL1, HDAC1, JAG1, NCSTN, NOTCH2, NUMBL, NUMB,  | 8.32 |
| miR-503                           | CTBP2, EP300, JAG2, KAT2B, NUMB, CTBP2, PSEN1, RBPJ    |      |
| miR-200b                          |                                                        |      |
| miR-133b                          |                                                        |      |
| <b>Thyroid Cancer</b>             |                                                        |      |
| miR-34b                           | CCDC6, CTNNB1, LEF1, MAP2K1, MYC, RET, TP53, CCND1,    | 8.21 |
| miR-449b                          | MAP2K1, KRAS, TCF7, TFG                                |      |
| miR-503                           |                                                        |      |
| miR-200b                          |                                                        |      |
| miR-133b                          |                                                        |      |
| <b>Glioma</b>                     |                                                        |      |
| miR-34b                           | GRB2, PDGFA, PIK3R3, E2F3, MAP2K1, PDGFRA, TP53, AKT3, | 8.06 |
| miR-449b                          | CCND1, E2F3, IGF1R, MAP2K1, PIK3R1, RAF1, E2F3, KRAS,  |      |
| miR-503                           | PLCG1, PRKCA, SHC1, SOS1, CALM1, EGFR, IGF1R           |      |
| miR-200b                          |                                                        |      |
| miR-133b                          |                                                        |      |
| <b>TGF-Beta Signaling Pathway</b> |                                                        |      |
| miR-34b                           | ACVR2A, ID2, RP26KB1, SMURF1, ACVR2B, E2F5, MYC,       | 7.82 |
| miR-449b                          | RPS6KB1, SMAD2, SMAD4, THBS1, ACVR2A, ACVR2B,          |      |
| miR-503                           | BMPR1A, SMAD7, SMURF1, SMURF2, ACVR1C, ACVR2A,         |      |
| miR-200b                          | EP300, NOG, PPP2R2C, RHOA, RPS6KB1, SMURF2, ID4,       |      |
| miR-133b                          | LTBP1, PPP2CA, PPP2CB, SP1, TGFBR1                     |      |
| <b>Acute Myleoid Leukemia</b>     |                                                        |      |
| miR-34b                           | GRB2, PIK3R3, RPS6KB1, LEF1, MAP2K1, MYC, RPS6KB1,     | 7.67 |
| miR-449b                          | AKT1, CCND1, IKBKB, MAP2K1, PIK3R1, RAF1, IKBKB, KRAS, |      |
| miR-503                           | PIM2, RPS6KB1, SOS1, JUP, PML, TCF7                    |      |
| miR-                              |                                                        |      |

---

|                                                        |                                                                               |      |
|--------------------------------------------------------|-------------------------------------------------------------------------------|------|
| 200b<br>miR-133b                                       |                                                                               |      |
| <b>Oxidative Phosphorylation</b>                       |                                                                               |      |
| miR-449b                                               | SDHC, NDUFS4, NDUFS3                                                          | 7.21 |
| miR-200b<br>miR-133b                                   |                                                                               |      |
| <b>Dorso-Ventral Axis Formation</b>                    |                                                                               |      |
| miR-34b<br>miR-449b<br>miR-503<br>miR-200b<br>miR-133b | ERBB4, GRB2, ETS1, MAP2K1, NOTCH2, MAP2K1, RAF1, ETS1, ETS2, KRAS, SOS1, EGFR | 7.18 |

---

The top 20 pathways, as determined by the Diana Lab DNA Intelligent Analysis, affected by miRNA dysregulation in women with VBD are shown with the names and union  $-\ln(p\text{-value})$  of target genes affected in each pathway. Genes are linked to miRNAs by color.

---

Supplemental Table 3. MicroRNA Pathway Dysregulation in VBD+IBS

| MiRNAs                                                       | Target Genes                                                                                                                                                                                                                                                                                                                                                                                                                                        | ln(p-val) |
|--------------------------------------------------------------|-----------------------------------------------------------------------------------------------------------------------------------------------------------------------------------------------------------------------------------------------------------------------------------------------------------------------------------------------------------------------------------------------------------------------------------------------------|-----------|
| <b>MAPK Signaling Pathway</b>                                |                                                                                                                                                                                                                                                                                                                                                                                                                                                     |           |
| miR-593<br>let-7f-2#<br>miR-125a-3p<br>miR-512-3p<br>miR-661 | PDGFA, PDGFB, PTPN5, PTPRR, RAP1B, RPS6KA1, TAOK3, TGFB2, ACVR1B, ACVR1C, CACNA1D, CASP3, DUSP16, DUSP1, DUSP4, DUSP9, FGF11, FGF5, FLNA, MAP3K1, MAP3K3, MAP3K7IP2, MAP4K3, MAP4K4, MAPK11, MAPK8, NGF, NLK, PAK1, PDGFB, PPP3CA, RPS6KA3, TGFB1, TP53, IL1R1, NF1, NLK, RPS6KA3, AKT1, CRK, DUSP1, EVI1, FGF19, MAP3K14, MAP3K1, MAPK10, MEF2C, MKNK2, PAK2, PPP3CA, RPS6KA2, RPS6KA3, RPS6KA5, SOS1, TGFB2, DUSP3, FLNA, MAP3K10, MAP3K3, PLA2G6 | 16.5      |
| <b>TGF-Beta Signaling Pathway</b>                            |                                                                                                                                                                                                                                                                                                                                                                                                                                                     |           |
| miR-593<br>let-7f<br>miR-125a-3p<br>miR-512-3p<br>miR-661    | ACVR1, BMPR2, NOG, SP1, TGFB2, ACVR1B, ACVR1C, ACVR2A, ACVR2B, CHRD, E2F5, GDF6, TGFB1, THBS1, ZFYVE16, ACVR2B, BMPR2, CUL1, E2F5, INHBB, LEFTY1, LEFTY2, PITX2, RBL1, RBL2, SMAD2, TGFB2, PPP2R1A                                                                                                                                                                                                                                                  | 16.07     |
| <b>Chronic Myeloid Leukemia</b>                              |                                                                                                                                                                                                                                                                                                                                                                                                                                                     |           |
| miR-593<br>let-7f<br>miR-125a-3p<br>miR-512-3p<br>miR-661    | CDK6, CTBP2, SHC4, TGFB2, ACVR1B, ACVR1C, BCL2L1, CBL, CCND1, CDKN1A, RB1, TGFB1, TP53, E2F3, ACVR1C, APPL1, BCL2, JUN, KRAS, MAPK9, RAC1, SOS1, EGFR, IGF1R, TCF7, TGFB1                                                                                                                                                                                                                                                                           | 15.09     |
| <b>Colorectal Cancer</b>                                     |                                                                                                                                                                                                                                                                                                                                                                                                                                                     |           |
| miR-593<br>let-7f<br>miR-125a-3p<br>miR-512-3p<br>miR-661    | CREB1, CREB3, CREB3L1, CTNBN1, GRB2, PDGFA, PIK3R3, CREB1, CREB3L1, E2F3, LEF1, MAP2K1, PDGFRA, TP53, AKT3, BCL2, CCND1, CCNE1, CREB5, E2F3, IGF1R, IKBKB, MAP2K1, PIK3RI, RAF1, AKT1, CCND1, CDK4, CRK, E2F3, EVI1, PIK3CA, RUNX1, SOS1, TGFB2, CBL, CDK6                                                                                                                                                                                          | 11.98     |
| <b>Focal Adhesion</b>                                        |                                                                                                                                                                                                                                                                                                                                                                                                                                                     |           |
| miR-593<br>let-7f<br>miR-125a-3p<br>miR-512-3p<br>miR-661    | COL4A6, ITGA10, ITGA5, PDGFA, RAP1B, SHC4, CCND1, CCND2, COL11A1, COL1A1, COL1A2, COL3A1, COL4A1, COL4A6, COL5A2, FLNA, IGF1, IGF1R, ITGB3, MAPK8, PAK1, PDGFB, THBS1, VAV3, FYN, IGF1R, ITGB1, ACTG1, AKT1, CCND1, CCND2, CRK, FLT1, IGF1R, ITGB8, LAMA3, MAPK10, PAK2, PAK7, PIK3CA, SOS1, COL6A3, FLNA, ITGA10, KDR                                                                                                                              | 11.35     |
| <b>Axon Guidance</b>                                         |                                                                                                                                                                                                                                                                                                                                                                                                                                                     |           |
| miR-593<br>let-7f<br>miR-125a-3p<br>miR-512-3p<br>miR-661    | EPHB3, SRGAP3, EPHA4, EPHB1, LIMK2, PAK1, PPP3CA, SEMA4C, SEMA4F, SEMA4G, CFL2, DCC, FYN, ITGB1, SEMA5B, ABLIM1, CFL2, DPYSL5, EFNB2, EPHA2, EPHA8, NTN4, PAK2, PAK7, PLXNA1, PPP3CA, SEMA3C, GNAI2, SEMA4G, SLIT1, SRGAP3                                                                                                                                                                                                                          | 10.33     |
| <b>Pancreatic Cancer</b>                                     |                                                                                                                                                                                                                                                                                                                                                                                                                                                     |           |
| miR-593<br>let-7f<br>miR-125a-3p<br>miR-512-3p               | CDK6, TGFB2, ACVR1B, ACVR1C, BCL2L1, CCND1, MAPK8, RB1, TGFB1, TP53, CASP9, E2F3, AKT1, CCND1, CDK4, E2F3, MAPK10, PIK3CA, SMAD2, TGFB2, CDK6                                                                                                                                                                                                                                                                                                       | 8.91      |

|                                                                                              |                                                                                                                                                                      |      |
|----------------------------------------------------------------------------------------------|----------------------------------------------------------------------------------------------------------------------------------------------------------------------|------|
| <b>miR-661</b>                                                                               |                                                                                                                                                                      |      |
| <b>ECM Receptor Interaction</b>                                                              |                                                                                                                                                                      |      |
| <b>miR-593</b><br><b>let-7f</b><br><b>miR-125a-3p</b><br><b>miR-512-3p</b><br><b>miR-661</b> | <b>COL4A6, FNDC1, ITGA10, ITGA5, COL11A1, COL1A1, COL1A2, COL3A1, COL4A1, COL4A6, COL5A2, FNDC3A, ITGB3, THBS1, ITGB1, CD44, FNDC3A, LAMA3, COL6A3, DAG1, ITGA10</b> | 8.61 |
| <b>Oxidative Phosphorylation</b>                                                             |                                                                                                                                                                      |      |
| <b>miR-512-3p</b>                                                                            | <b>ATP5E</b>                                                                                                                                                         | 6.81 |
| <b>Glioma</b>                                                                                |                                                                                                                                                                      |      |
| <b>miR-593</b><br><b>let-7f</b><br><b>miR-125a-3p</b><br><b>miR-512-3p</b><br><b>miR-661</b> | <b>CDK6, PDGFA, PDGFB, SHC4, CCND1, CDKN1A, IGF1, IGF1R, PDGFB, RB1, TP53, E2F3, IGF1R, AKT1, CCND1, CDK4, E2F3, IGF1R, PIK3CA, SOS1, CDK6</b>                       | 6.7  |
| <b>Melanoma</b>                                                                              |                                                                                                                                                                      |      |
| <b>miR-593</b><br><b>let-7f</b><br><b>miR-125a-3p</b><br><b>miR-512-3p</b><br><b>miR-661</b> | <b>CDK6, PDGFA, CCND1, CDKN1A, FGF11, FGF5, IGF1, IGF1R, PDGFB, RB1, TP53, E2F3, IGF1R, AKT1, CCND1, CDK4, E2F3, FGF19, IGH1R, PIK3CA, CDK6</b>                      | 6.27 |
| <b>Adherens Junction</b>                                                                     |                                                                                                                                                                      |      |
| <b>miR-593</b><br><b>let-7f</b><br><b>miR-125a-3p</b><br><b>miR-512-3p</b><br><b>miR-661</b> | <b>TCF7, ACVR1B, ACVR1C, IGF1R, INSR, NLK, TGFBR1, WASL, FYN, IGF1R, INSR, NLK, SNAI1, ACTG1, IGF1R, LEF1, SAMD2, SSX1P, TGFBR2, PVRL2, WASL</b>                     | 6.27 |
| <b>Prostate Cancer</b>                                                                       |                                                                                                                                                                      |      |
| <b>miR-593</b><br><b>let-7f</b><br><b>miR-125a-3p</b><br><b>miR-512-3p</b>                   | <b>CREB3L1, PDGFA, TCF7, CCND1, CDKN1A, IGF1, IGF1R, INS, PDGFB, RB1, TP53, CASP9, E2F3, IGF1R, INS, AKT1, CCND1, CREB5, E2F3, IGF1R, LEF1, PIK3CA, SOS1</b>         | 5.65 |
| <b>Type II Diabetes</b>                                                                      |                                                                                                                                                                      |      |
| <b>let-7f</b><br><b>miR-125a-3p</b><br><b>miR-512-3p</b><br><b>miR-661</b>                   | <b>CACNA1D, INSR, IRS2, MAPK8, SOCS1, SOCS4, INS, INSR, MAPK10, PIK3CA, SLC2A4, SOCS4</b>                                                                            | 5.3  |
| <b>mTOR Signaling Pathway</b>                                                                |                                                                                                                                                                      |      |
| <b>miR-593</b><br><b>let-7f</b><br><b>miR-125a-3p</b><br><b>miR-512-3p</b><br><b>miR-661</b> | <b>RPS6KA1, IGF1, INS, RICTOR, RP26KA3, TSC1, ULK2, INS, RPS6KA3, AKT1, PIK3CA, RPS6KA2, RPS6KA3, ULK1, ULK2</b>                                                     | 4.77 |
| <b>Dentatorubropallidoluysian Atrophy (DRPLA)</b>                                            |                                                                                                                                                                      |      |
| <b>miR-593</b><br><b>let-7f</b><br><b>miR-125a-</b>                                          | <b>ITCH, CASP3, INSR, INS, INSR, MAGI1</b>                                                                                                                           | 4.75 |

|                                                                                       |                                                                                                                                                                                                                                       |      |
|---------------------------------------------------------------------------------------|---------------------------------------------------------------------------------------------------------------------------------------------------------------------------------------------------------------------------------------|------|
| <b>3p</b><br>miR-512-3p                                                               |                                                                                                                                                                                                                                       |      |
| <b>Bladder Cancer</b>                                                                 |                                                                                                                                                                                                                                       |      |
| <b>let-7f</b><br><b>miR-125a-3p</b><br>miR-512-3p                                     | CCND1, CDKN1A, IL8, RB1, THBS1, TP53, E2F3, CCND1, CDK4, DAPK2, E2F3, IL8, RPS6KA5                                                                                                                                                    | 4.52 |
| <b>Wnt Signaling Pathway</b>                                                          |                                                                                                                                                                                                                                       |      |
| <b>miR-593</b><br><b>let-7f</b><br><b>miR-125a-3p</b><br>miR-512-3p<br><b>miR-661</b> | CTBP2, FOSL1, FXD7, NKD1, PRICKLE2, TCF7, VANGL1, VANGL2, CCND1, CCND2, FZD4, MAPK8, NKD1, NLK, PPP3CA, SENP2, TP53, VANGL1, VANGL2, WNT1, CSNK1E, NLK, CCND1, CCND2, CUL1, LEF1, MAPK10, PPP3CA, SMAD2, FZD4, FZD8, PPP2R1A          | 4.08 |
| <b>ErbB Signaling Pathway</b>                                                         |                                                                                                                                                                                                                                       |      |
| <b>miR-593</b><br><b>let-7f</b><br><b>miR-125a-3p</b><br>miR-512-3p<br><b>miR-661</b> | ERBB4, NRG3, SHC4, ABL2, CBL, CDKN1A, MAPK8, PAK1, NRG1, AKT1, CRK, MAPK10, PAK2, PAK7, PIK3CA, SOS1, CBL                                                                                                                             | 3.75 |
| <b>Regulation of Actin Cytoskeleton</b>                                               |                                                                                                                                                                                                                                       |      |
| <b>miR-593</b><br><b>let-7f</b><br><b>miR-125a-3p</b><br>miR-512-3p<br><b>miR-661</b> | ITGA10, ITGA5, ITGB1, PDGFA, SCIN, DIAPH2, FGF11, FGF5, ITGB3, LIMK2, PAK1, PDGFB, RDX, SSH1, VAV3, WASL, CFL2, INS, ITGB1, ACTG1, CFL2, CRK, FGF19, ITGB8, PAK2, PAK7, PFN2, PIK3CA, RDX, SOS1, SSH2, ARHGEF4, ITGA10, PIP4K2B, WASL | 3.65 |

The top 20 pathways, as determined by the Diana Lab DNA Intelligent Analysis, affected by miRNA dysregulation in women with VBD+IBS are shown with the names and union  $-\ln(p\text{-value})$  of target genes affected in each pathway. Genes are linked to miRNAs by color.

#### Figure 4 Abbreviations

*Abbreviations:* insulin (INS), insulin receptor (INSR), extracellular signal-regulated kinases (ERK), insulin receptor substrate 2 (IRS2), phosphatidylinositol-4,5-Bisphosphate 3-Kinase, Catalytic Subunit Alpha (PIK3CA), brain-specific angiogenesis inhibitor 1-associated protein 2 (BAIAP2), dentatorubral-pallidoluysian atrophy (DRPLA), caspase 3 (CASP3), suppressor of cytokine signaling 1 (SOCS), alpha-1 type I collagen (COL1a1), laminin alpha-3 (LAMA3), fibronectin type III domain containing 1 (FNDC1), thrombospondin 1 (THBS1), integrin alpha-5 (ITGA5), integrin beta-1 (ITGB1), dystroglycan 1 (DAG1), extracellular matrix (ECM), transforming growth factor beta (TGF-B), TGF-B receptor 2 (TGFB2), TGF-B receptor 1 (TGFB1), death domain-associated protein (DAXX), RAC-alpha serine/threonine-protein kinase (AKT1), mitogen-activated protein kinase (MAPK), ribosomal protein S6 kinase 90kDa polypeptide 3 (RPS6KA3), cell division cycle 25B (CDC25B), MYC-associated factor X (MAX), myocyte enhancer factor 2C (MEF2C), protein phosphatase 2 regulatory subunit A beta (PPP2R1B), Rho-associated coiled-coil containing protein kinase 1 (ROCK1), E2F transcription factor 5 p130-binding (E2F5), cyclin-dependent kinase 4 inhibitor B (p15), inhibin beta B (INHBB), activin A receptor type II-like 1 (ACVRL1), wntless-type MMTV integration site family member 3A (WNT3A), frizzled class receptor 10 (FZD10), phospholipase C beta 4 (PLCB4), protein phosphatase 3 catalytic subunit alpha isozyme (PPP3CA), nuclear factor of activated T cells cytoplasmic calcineurin-dependent 2 (NFATC2), jun proto-oncogene (c-JUN), disheveled segment polarity protein 3 (Dvl3), glycogen synthase kinase 3 beta (GSK-3B), beta-catenin (B-catenin), transcription factor 7-like 2 (TCF7L2), disheveled-associated activator of morphogenesis 1 (Daam1), ras homolog family member A (RhoA), VANGL Planar Cell Polarity Protein 1 (VANGL1), dual-specificity protein phosphatase (DUSP), platelet-derived growth factor alpha polypeptide (PDGFA), PDGF receptor alpha polypeptide (PDGFRA), growth factor receptor-bound protein 2 (GRB2), son of sevenless homolog 1 (SOS1), methyl ethyl ketone (MEK), MAPK interacting serine/threonine kinase 2 (MKNK2), cyclic adenosine monophosphate (cAMP), protein kinase cAMP-dependent catalytic beta (PRKACB), member of ras oncogene family (RAP1A), MAPK kinase 4 (MKK4), c-Jun N-terminal kinase (JNK), nuclear factor kappa beta (NFkB), Kirsten rat sarcoma viral oncogene homolog (KRAS), proto-oncogene c-RAF (RAF1), v-ets erythroblastosis virus E26 oncogene homolog (ETS), broad-complex (BR-C), gonadotropin-releasing hormone (GnRH), luteinizing hormone beta polypeptide (LHB), alpha gonadotropin (aGSU), follicle-stimulating hormone beta subunit (FSHB), heparin-binding EGF-like growth factor (HB-EGF), epidermal growth factor receptor (EGFR), proto-oncogene c-Src (Src), cell-division control protein 42 homolog (CDC42), v-erb-b2 avian erythroblastic leukemia viral oncogene homolog 4 (ERBB4), protein kinase cGMP-dependent type I (PRKG1), protein kinase C alpha (PRKCA), PRK cAMP-dependent catalytic beta (PRKACB), adenylate cyclase 1 (ADCY1), G protein alpha inhibiting activity polypeptide 3 (GNAI3), guanylate cyclase 1 alpha 3 (GUCY1A3), inositol 1,4,5- trisphosphate receptor type 1 (ITPR1), phospholipase C beta 4 (PLCB4), lysophosphatidic acid receptor 1 (LPA1), lipoprotein (LPA), serotonin receptor (HTR2).
